# Supplementary material for: Unveiling the Anti-Cancer Potential of Onoceranoid Triterpenes from Lansium domesticum Corr. cv. kokosan: An In Silico Study against Estrogen Receptor Alpha
Source: MDPI journal article supplement (doi:10.3390/ijms241915033), 2023-10-09
Supplement: s1 [file s1]

Supplementary Materials

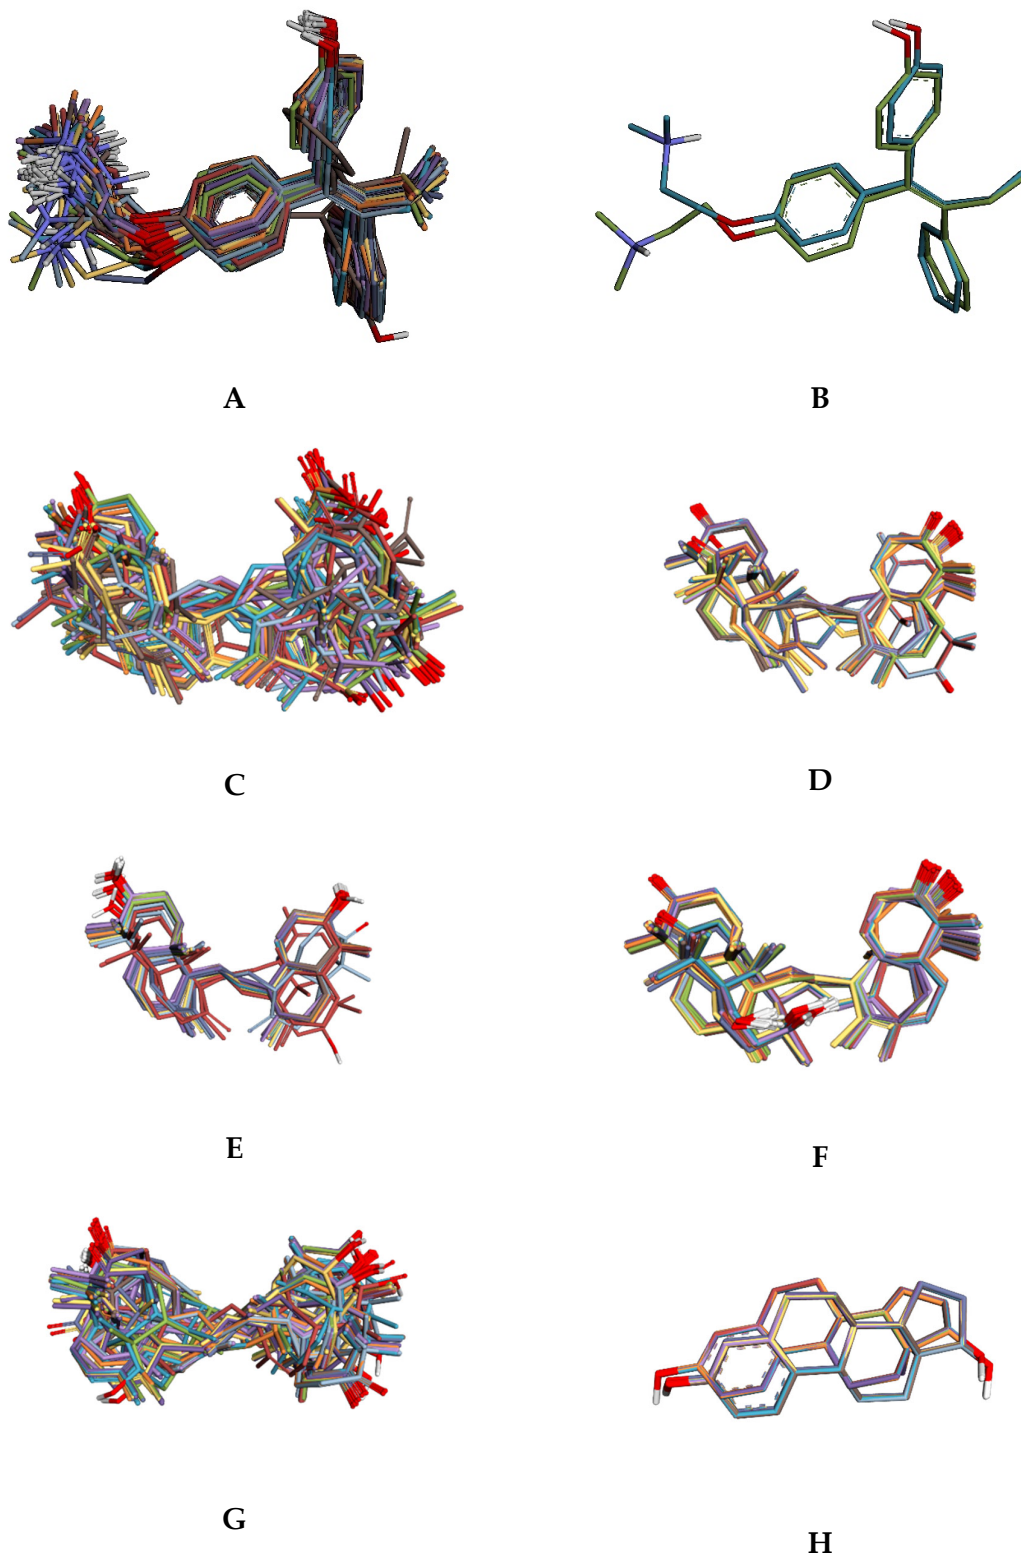

**Figure S1.** Redocking results of tamoxifen to ERα. (A) 100-Structure overlay of poses generated from tamoxifen redocking procedure. Ninety-nine poses reproduce the crystal structure conformation

with RMSD values below 1.50. (B) Overlay of the redocking pose with the best binding energy score (turquoise) and the crystal structures (green) of tamoxifen. First Cluster-Structure overlay of poses generated from (C) compound 1, (D) compound 2, (E) compound 3, (F) compound 4, (G) compound 5, and (H) Estradiol docking procedures.

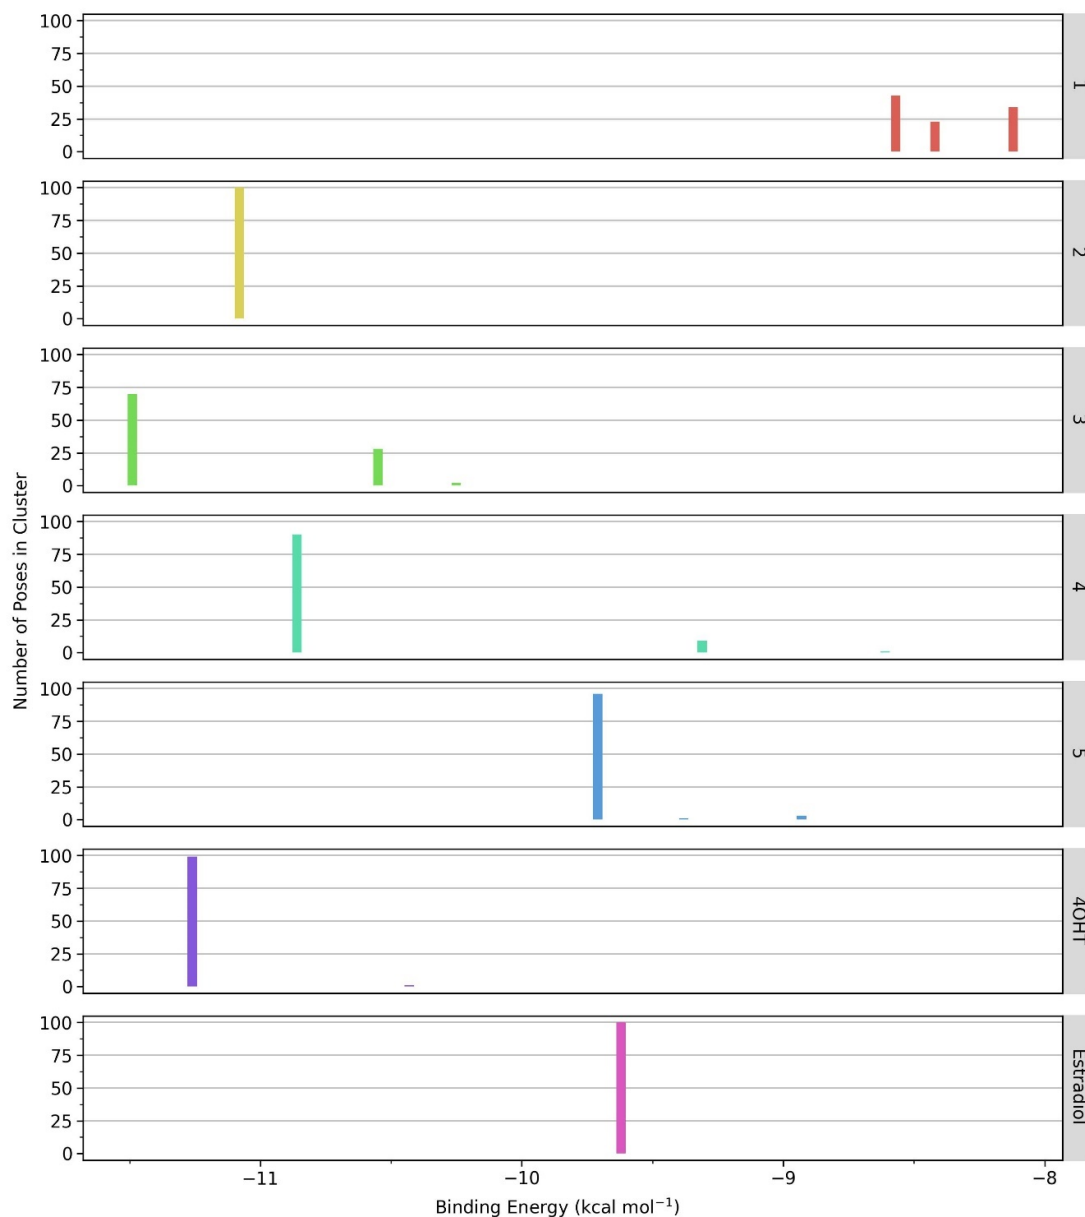

**Figure S2.** Cluster analyses of docking poses of **1**, **2**, **3**, **4**, **5**, 4OHT, and estradiol to ER $\alpha$ . The docking poses were generated by AutoDock4.2.

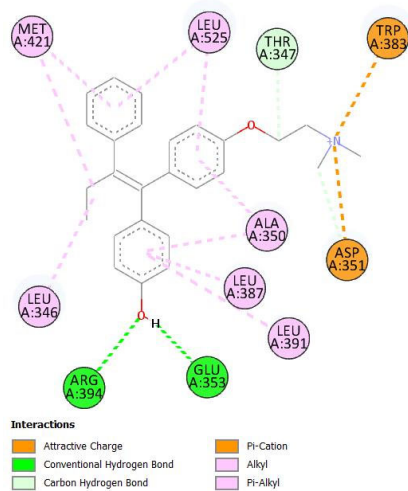

4OHT

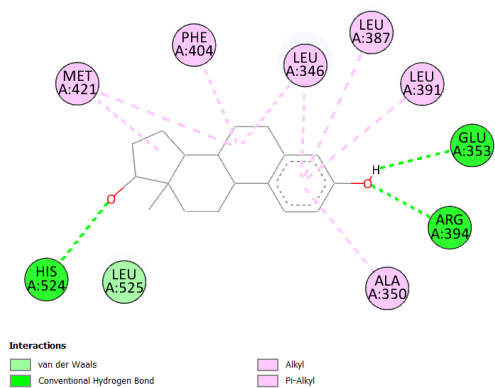

Estradiol

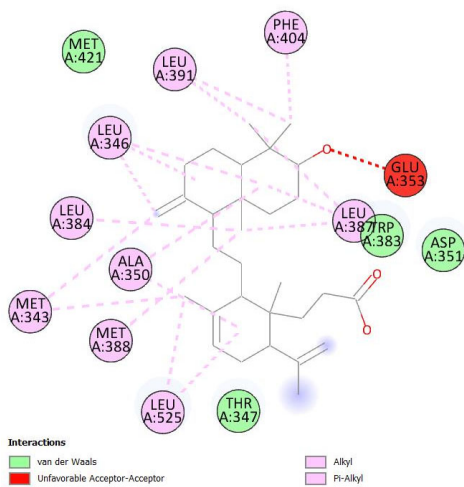

1

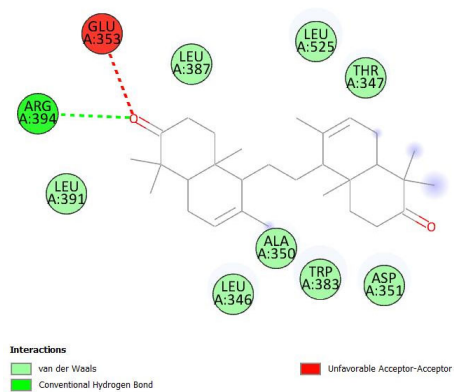

2

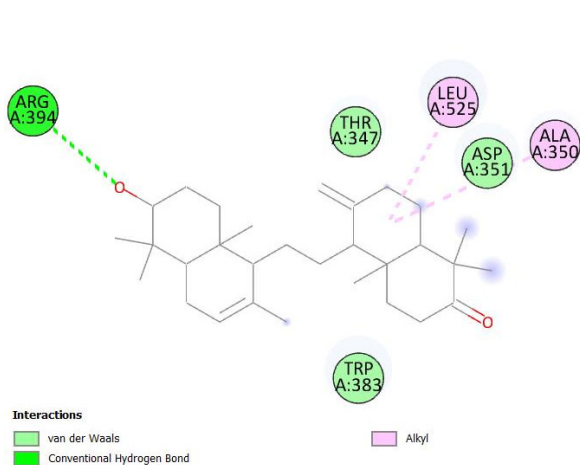

3

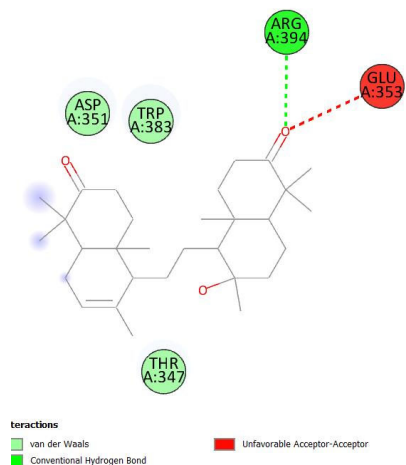

4

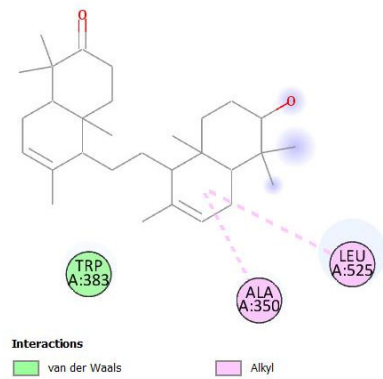

5

**Figure S3.** Molecular interactions between ligands and ER $\alpha$ . The ligands include **1**, **2**, **3**, **4**, **5**, 4OHT, and estradiol.

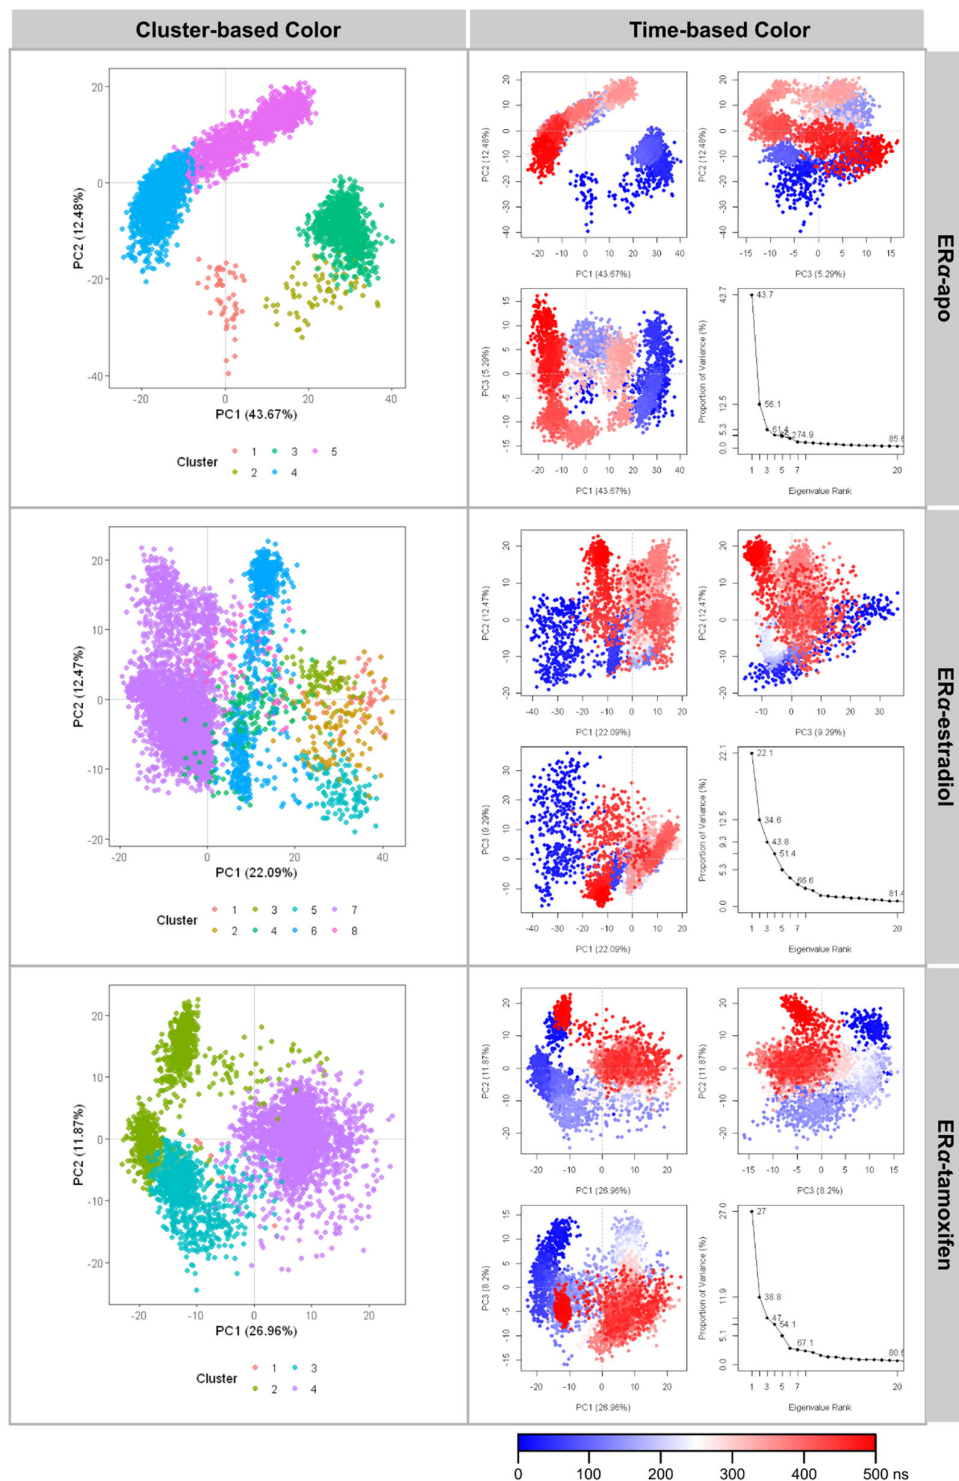

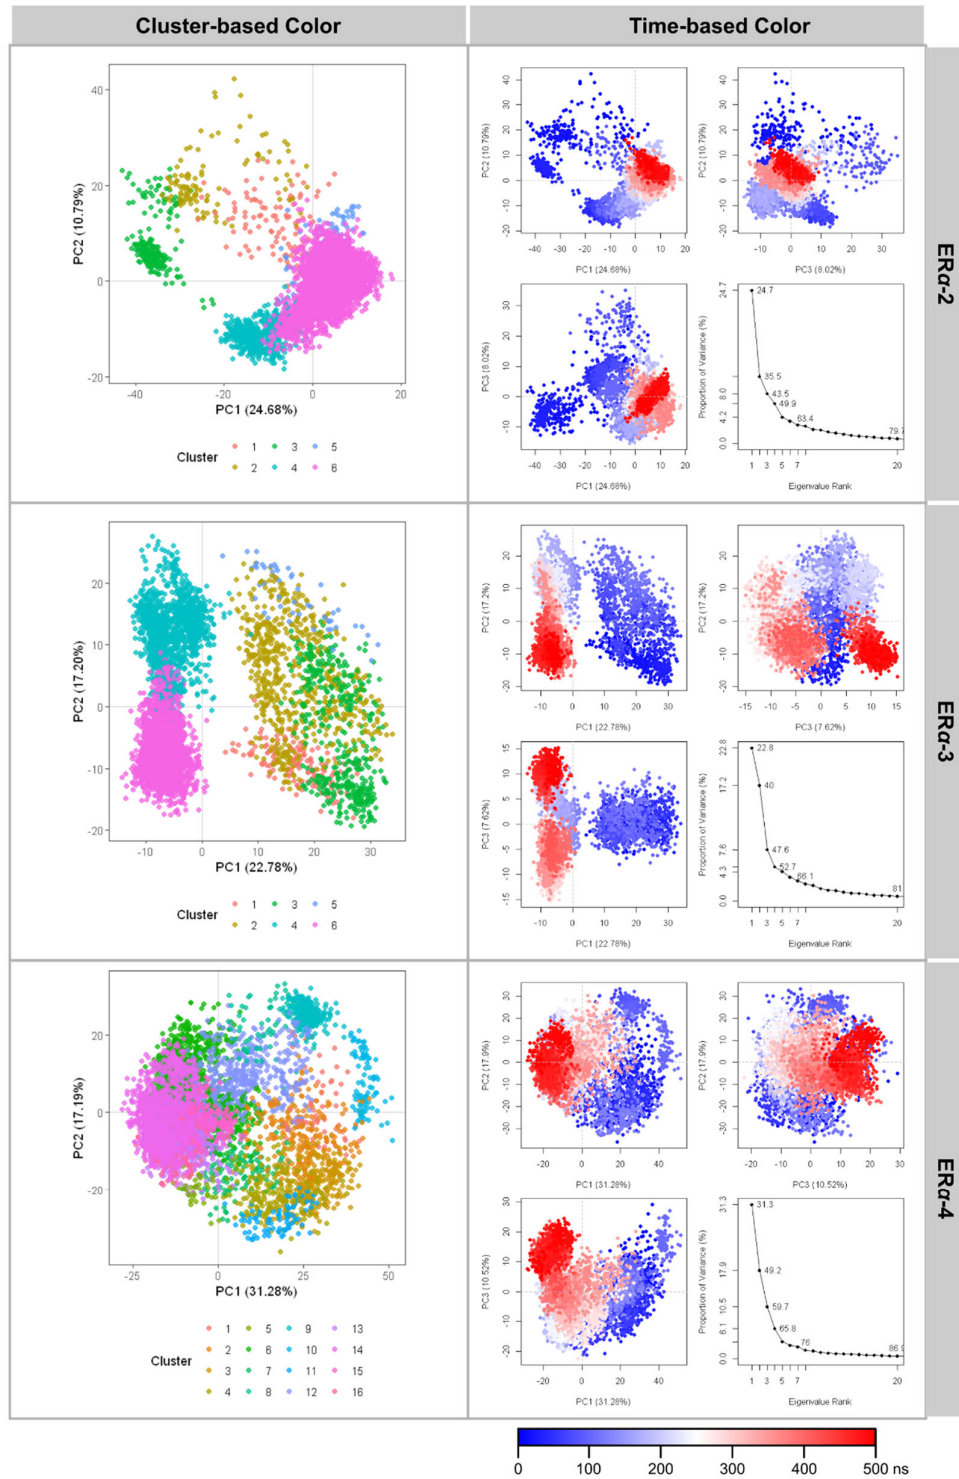

**Figure S4.** Left panels show principal component (PC) maps colored according to hierarchical clustering on principal component analysis (HCPC). Right panels show PC maps colored according to time scale. Time scale colors are from blue, white, to red.

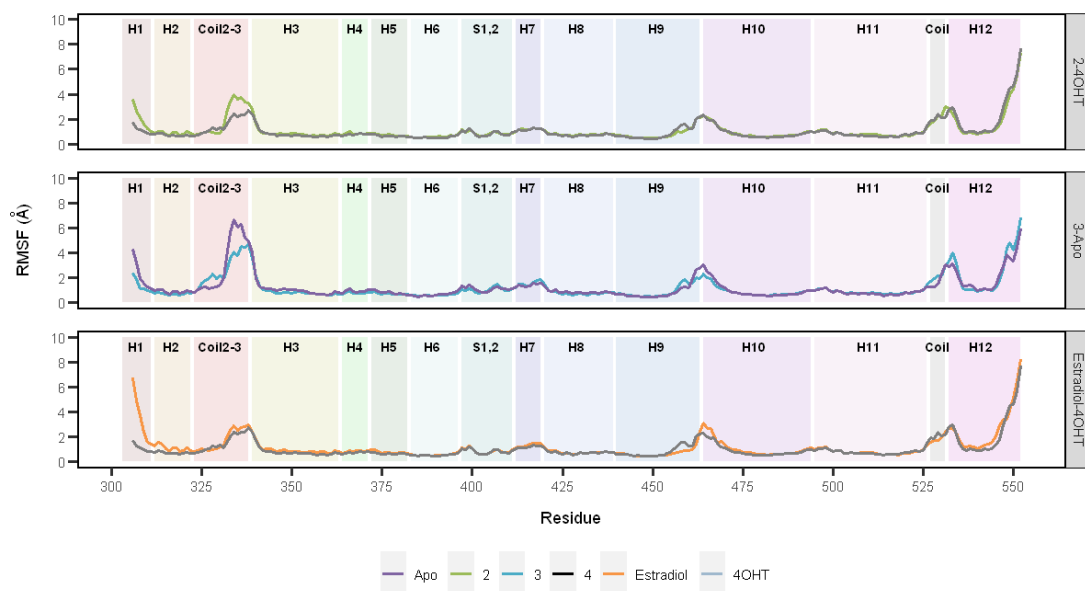

**Figure S5.** Pair-wise RMSF profile comparison between 2- and 4OHT-bound ER $\alpha$  (top panel), 3-bound and apo forms of ER $\alpha$  (middle panel), and estradiol- and 4OHT-bound ER $\alpha$  (lower panel).

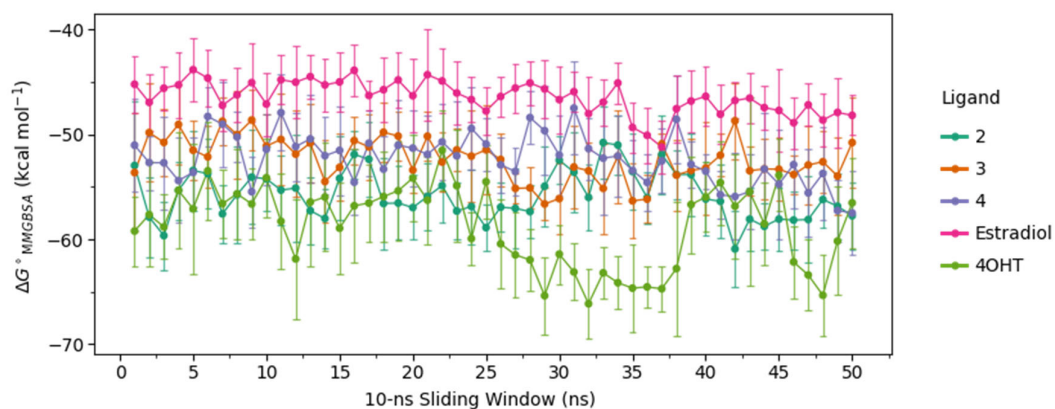

**Figure S6.** MMGBSA binding energy trajectories of ER $\alpha$ -bound ligands over 500 ns. Each data point was computed from a 10-ns sliding window.



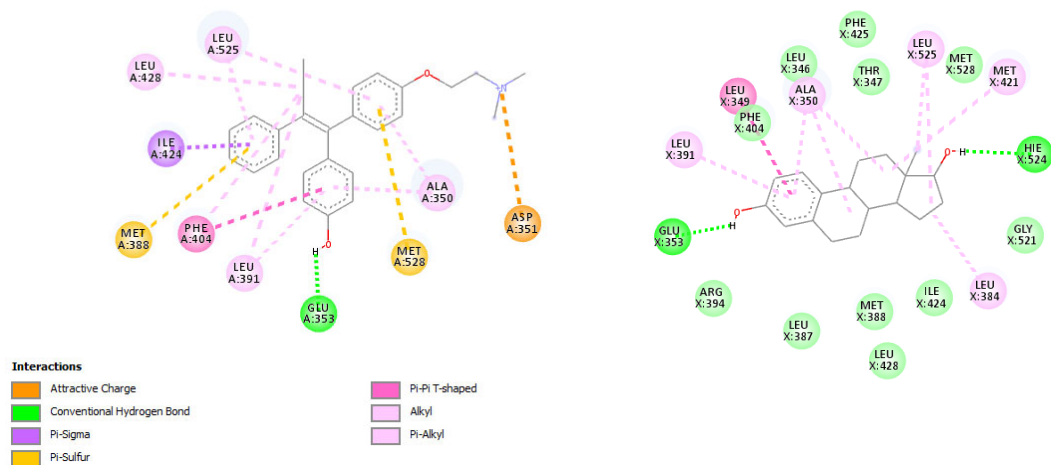

4OHT

Estradiol

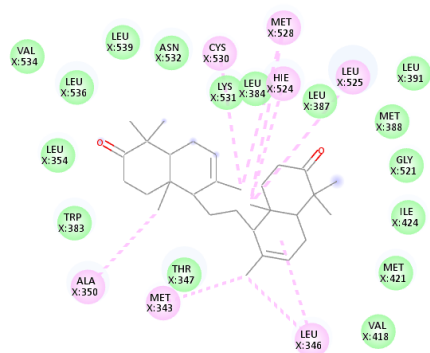

2

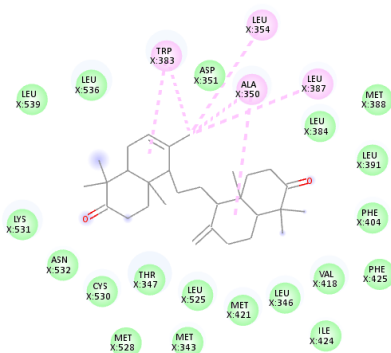

3

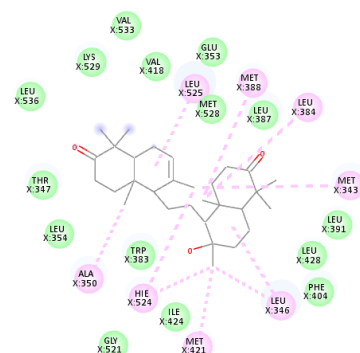

4

**Figure S7.** Interactions of between ligands and ER $\alpha$  after MD simulations. The ligands include 4OHT, estradiol, 2, 3, and 4. The last frame of each MD system was used for visualization.



**Table S1.** Re-docking results of 4OHT to ERa. 4OHT and ERa are originated from crystal structure with PDB ID 3ERT.

| Cluster | Rank | Sub Rank | Binding Energy (kcal mol <sup>-1</sup> ) | Reference RMSD (Å) |
|---------|------|----------|------------------------------------------|--------------------|
| 1       | 1    | 25       | -11.50                                   | 1.14               |
| 1       | 2    | 60       | -11.49                                   | 1.00               |
| 1       | 3    | 71       | -11.48                                   | 1.10               |
| 1       | 4    | 45       | -11.47                                   | 1.10               |
| 1       | 5    | 87       | -11.46                                   | 1.00               |
| 1       | 6    | 14       | -11.45                                   | 1.20               |
| 1       | 7    | 37       | -11.44                                   | 1.01               |
| 1       | 8    | 47       | -11.43                                   | 0.99               |
| 1       | 9    | 44       | -11.43                                   | 1.17               |
| 1       | 10   | 27       | -11.43                                   | 1.20               |
| 1       | 11   | 38       | -11.42                                   | 0.98               |
| 1       | 12   | 64       | -11.42                                   | 0.97               |
| 1       | 13   | 29       | -11.42                                   | 1.11               |
| 1       | 14   | 9        | -11.41                                   | 1.13               |
| 1       | 15   | 80       | -11.41                                   | 0.99               |
| 1       | 16   | 77       | -11.40                                   | 1.07               |
| 1       | 17   | 34       | -11.40                                   | 0.87               |
| 1       | 18   | 49       | -11.39                                   | 1.05               |
| 1       | 19   | 36       | -11.39                                   | 1.03               |
| 1       | 20   | 3        | -11.39                                   | 0.95               |
| 1       | 21   | 89       | -11.39                                   | 1.02               |
| 1       | 22   | 35       | -11.38                                   | 1.09               |
| 1       | 23   | 94       | -11.38                                   | 0.96               |
| 1       | 24   | 63       | -11.38                                   | 0.88               |
| 1       | 25   | 13       | -11.38                                   | 1.03               |
| 1       | 26   | 68       | -11.38                                   | 1.05               |
| 1       | 27   | 42       | -11.38                                   | 0.94               |
| 1       | 28   | 21       | -11.38                                   | 1.12               |
| 1       | 29   | 74       | -11.37                                   | 0.98               |
| 1       | 30   | 52       | -11.37                                   | 1.01               |
| 1       | 31   | 32       | -11.37                                   | 0.97               |
| 1       | 32   | 30       | -11.36                                   | 1.00               |
| 1       | 33   | 4        | -11.36                                   | 1.02               |
| 1       | 34   | 39       | -11.36                                   | 1.03               |
| 1       | 35   | 17       | -11.36                                   | 1.04               |
| 1       | 36   | 48       | -11.35                                   | 1.05               |
| 1       | 37   | 26       | -11.34                                   | 0.92               |
| 1       | 38   | 95       | -11.32                                   | 1.06               |
| 1       | 39   | 54       | -11.31                                   | 0.91               |
| 1       | 40   | 92       | -11.31                                   | 0.97               |
| 1       | 41   | 98       | -11.31                                   | 1.00               |
| 1       | 42   | 75       | -11.31                                   | 0.91               |
| 1       | 43   | 18       | -11.31                                   | 1.04               |
| 1       | 44   | 53       | -11.31                                   | 0.91               |
| 1       | 45   | 100      | -11.31                                   | 0.99               |
| 1       | 46   | 19       | -11.31                                   | 0.97               |

| Cluster | Rank | Sub Rank | Binding Energy (kcal mol <sup>-1</sup> ) | Reference RMSD (Å) |
|---------|------|----------|------------------------------------------|--------------------|
| 1       | 47   | 2        | -11.31                                   | 1.01               |
| 1       | 48   | 65       | -11.30                                   | 0.92               |
| 1       | 49   | 59       | -11.30                                   | 1.10               |
| 1       | 50   | 93       | -11.30                                   | 1.00               |
| 1       | 51   | 43       | -11.30                                   | 1.03               |
| 1       | 52   | 12       | -11.30                                   | 0.89               |
| 1       | 53   | 91       | -11.29                                   | 1.07               |
| 1       | 54   | 1        | -11.28                                   | 0.98               |
| 1       | 55   | 51       | -11.28                                   | 0.94               |
| 1       | 56   | 84       | -11.27                                   | 0.86               |
| 1       | 57   | 40       | -11.27                                   | 1.05               |
| 1       | 58   | 10       | -11.26                                   | 0.90               |
| 1       | 59   | 86       | -11.26                                   | 0.97               |
| 1       | 60   | 85       | -11.25                                   | 0.99               |
| 1       | 61   | 73       | -11.24                                   | 1.03               |
| 1       | 62   | 76       | -11.24                                   | 0.90               |
| 1       | 63   | 15       | -11.23                                   | 0.97               |
| 1       | 64   | 81       | -11.21                                   | 0.96               |
| 1       | 65   | 69       | -11.21                                   | 0.89               |
| 1       | 66   | 96       | -11.21                                   | 0.93               |
| 1       | 67   | 99       | -11.20                                   | 1.00               |
| 1       | 68   | 61       | -11.20                                   | 1.06               |
| 1       | 69   | 7        | -11.19                                   | 0.97               |
| 1       | 70   | 6        | -11.19                                   | 0.90               |
| 1       | 71   | 88       | -11.18                                   | 0.96               |
| 1       | 72   | 62       | -11.17                                   | 0.95               |
| 1       | 73   | 22       | -11.16                                   | 1.05               |
| 1       | 74   | 58       | -11.16                                   | 0.94               |
| 1       | 75   | 5        | -11.16                                   | 1.09               |
| 1       | 76   | 11       | -11.13                                   | 1.02               |
| 1       | 77   | 33       | -11.13                                   | 0.81               |
| 1       | 78   | 66       | -11.13                                   | 0.92               |
| 1       | 79   | 31       | -11.13                                   | 0.81               |
| 1       | 80   | 50       | -11.12                                   | 1.05               |
| 1       | 81   | 70       | -11.11                                   | 0.76               |
| 1       | 82   | 82       | -11.11                                   | 1.31               |
| 1       | 83   | 67       | -11.10                                   | 0.68               |
| 1       | 84   | 78       | -11.10                                   | 0.95               |
| 1       | 85   | 8        | -11.09                                   | 1.08               |
| 1       | 86   | 24       | -11.08                                   | 0.96               |
| 1       | 87   | 41       | -11.07                                   | 1.20               |
| 1       | 88   | 83       | -11.06                                   | 0.83               |
| 1       | 89   | 90       | -11.05                                   | 0.82               |
| 1       | 90   | 46       | -11.03                                   | 0.96               |
| 1       | 91   | 23       | -11.03                                   | 0.66               |
| 1       | 92   | 72       | -11.02                                   | 1.02               |
| 1       | 93   | 16       | -10.95                                   | 1.12               |
| 1       | 94   | 79       | -10.95                                   | 0.92               |

| Cluster | Rank | Sub Rank | Binding Energy (kcal mol <sup>-1</sup> ) | Reference RMSD (Å) |
|---------|------|----------|------------------------------------------|--------------------|
| 1       | 95   | 20       | -10.94                                   | 0.95               |
| 1       | 96   | 55       | -10.94                                   | 0.99               |
| 1       | 97   | 57       | -10.90                                   | 0.81               |
| 1       | 98   | 97       | -10.84                                   | 0.91               |
| 1       | 99   | 28       | -10.74                                   | 0.92               |
| 2       | 1    | 56       | -10.43                                   | 3.16               |

**Table S1.** Molecular docking results of 4OHT, estradiol, and five onoceranoid triterpenes to ER $\alpha$ .

| Ligand    | Cluster Rank | Lowest Binding Energy (kcal mol <sup>-1</sup> ) | Mean Binding Energy (kcal mol <sup>-1</sup> ) | Number in Cluster |
|-----------|--------------|-------------------------------------------------|-----------------------------------------------|-------------------|
| 4OHT      | 1            | -11.50                                          | -11.26                                        | 99                |
|           | 2            | -10.43                                          | -10.43                                        | 1                 |
| Estradiol | 1            | -9.63                                           | -9.62                                         | 100               |
|           | 1            | -9.37                                           | -8.57                                         | 43                |
|           | 2            | -9.24                                           | -8.42                                         | 23                |
| 1         | 3            | -8.66                                           | -8.12                                         | 34                |
|           | 1            | -11.43                                          | -11.08                                        | 100               |
|           | 1            | -11.60                                          | -11.49                                        | 70                |
| 2         | 2            | -10.77                                          | -10.55                                        | 20                |
|           | 3            | -10.25                                          | -10.25                                        | 2                 |
|           | 1            | -11.05                                          | -10.86                                        | 90                |
| 3         | 2            | -9.89                                           | -9.31                                         | 9                 |
|           | 3            | -8.61                                           | -8.61                                         | 1                 |
|           | 1            | -10.03                                          | -9.71                                         | 96                |
| 4         | 2            | -9.38                                           | -9.38                                         | 1                 |
|           | 3            | -9.14                                           | -8.93                                         | 3                 |
|           | 3            | -9.14                                           | -8.93                                         | 3                 |

**Table S2.** Maximum, median, and interquartile range (IQR) of RMSD values of ER $\alpha$  in apo and ligand-binding forms. The RMSD values are calculated from 500-ns MD trajectories.

| Complex                | RMSD (Å)      |              |           |
|------------------------|---------------|--------------|-----------|
|                        | Maximum Value | Median Value | IQR Value |
| ER $\alpha$ -2         | 3.77          | 2.46         | 0.23      |
| ER $\alpha$ -3         | 3.88          | 2.66         | 0.36      |
| ER $\alpha$ -4         | 4.42          | 3.13         | 0.67      |
| Apo                    | 4.31          | 3.28         | 0.32      |
| ER $\alpha$ -Estradiol | 4.28          | 3.02         | 0.54      |
| ER $\alpha$ -4OHT      | 4.05          | 2.94         | 0.26      |

**Table S3.** Median values of MMGBSA binding energy and its energy terms of **2**, **3**, **4**, estradiol, and 4OHT to ER $\alpha$ .

| Ligand    | MMGBSA Binding Energy (kcal mol <sup>-1</sup> ) | MMGBSA Energy Terms (kcal mol <sup>-1</sup> ) |                |        |       |
|-----------|-------------------------------------------------|-----------------------------------------------|----------------|--------|-------|
|           |                                                 | vdW                                           | Electrostatics | EGB    | ESurf |
| <b>2</b>  | -56.10                                          | -58.88                                        | -3.68          | 13.25  | -7.13 |
| <b>3</b>  | -52.27                                          | -52.57                                        | -7.23          | 13.97  | -6.53 |
| <b>4</b>  | -52.17                                          | -56.50                                        | -3.67          | 14.75  | -7.03 |
| Estradiol | -46.35                                          | -39.20                                        | -19.69         | 18.01  | -5.31 |
| 4OHT      | -57.37                                          | -53.45                                        | -186.71        | 189.13 | -7.55 |

**Table S4.** Median values of MMGBSA binding energy contribution and its energy terms of **2**, **3**, **4**, estradiol, and 4OHT to amino acid residues of ER $\alpha$ .

| Residue | Median Value of MMGBSA Energy Terms (kcal mol <sup>-1</sup> ) |                     |                 |        | MMGBSA Energy (kcal mol <sup>-1</sup> ) | Ligand |
|---------|---------------------------------------------------------------|---------------------|-----------------|--------|-----------------------------------------|--------|
|         | Electrostatic                                                 | Non-Polar Solvation | Polar Solvation | vdW    |                                         |        |
| Thr347  | -0.238                                                        | -1.845              | 0.218           | -2.468 | -4.350                                  | 2      |
| Leu525  | -0.024                                                        | -1.879              | 0.058           | -2.399 | -4.292                                  | 2      |
| Leu346  | -0.022                                                        | -1.332              | -0.156          | -2.088 | -3.594                                  | 2      |
| Met528  | -0.067                                                        | -1.275              | -0.191          | -1.852 | -3.392                                  | 2      |
| Ala350  | 0.164                                                         | -1.345              | -0.337          | -1.583 | -3.089                                  | 2      |
| Lys529  | -0.255                                                        | -0.756              | -0.259          | -1.166 | -2.58                                   | 2      |
| Hie524  | -0.2                                                          | -0.849              | 0.364           | -1.466 | -2.232                                  | 2      |
| Trp383  | 0.197                                                         | -0.943              | -0.2            | -1.255 | -2.118                                  | 2      |
| Asp351  | -1.302                                                        | -0.792              | 1.32            | -1.187 | -1.991                                  | 2      |
| Met421  | -0.097                                                        | -0.706              | 0.136           | -0.991 | -1.676                                  | 2      |
| Leu354  | 0.156                                                         | -0.72               | -0.166          | -0.891 | -1.617                                  | 2      |
| Leu387  | -0.175                                                        | -0.491              | -0.157          | -0.702 | -1.574                                  | 2      |
| Met343  | -0.158                                                        | -0.699              | 0.394           | -1.051 | -1.513                                  | 2      |
| Asp426  | -0.031                                                        | 0                   | 0.054           | -0.01  | 0.014                                   | 2      |
| Ser395  | -0.066                                                        | 0                   | 0.086           | -0.006 | 0.016                                   | 2      |
| Glu330  | -0.444                                                        | 0                   | 0.509           | -0.012 | 0.058                                   | 2      |
| Glu419  | -0.594                                                        | 0                   | 0.737           | -0.057 | 0.082                                   | 2      |
| Thr347  | -0.104                                                        | -1.584              | 0.284           | -2.293 | -3.687                                  | 3      |
| Leu525  | 0.086                                                         | -1.497              | -0.18           | -1.664 | -3.254                                  | 3      |
| Ala350  | 0.12                                                          | -1.37               | -0.271          | -1.543 | -3.066                                  | 3      |
| Trp383  | 0.008                                                         | -1.434              | 0.389           | -1.846 | -2.898                                  | 3      |
| Leu387  | 0.269                                                         | -0.962              | -0.59           | -1.324 | -2.599                                  | 3      |
| Asn532  | -0.625                                                        | -0.784              | 0.225           | -0.939 | -2.509                                  | 3      |
| Leu346  | 0.041                                                         | -0.951              | -0.128          | -1.43  | -2.43                                   | 3      |
| Cys530  | -0.169                                                        | -0.784              | 0.089           | -0.987 | -2.012                                  | 3      |
| Leu354  | 0.103                                                         | -0.792              | -0.286          | -0.891 | -1.866                                  | 3      |
| Met421  | -0.058                                                        | -0.82               | 0.03            | -1.01  | -1.866                                  | 3      |
| Leu536  | 0.077                                                         | -0.933              | -0.087          | -0.92  | -1.86                                   | 3      |
| Leu384  | 0.196                                                         | -0.739              | -0.294          | -0.971 | -1.841                                  | 3      |
| Met388  | -0.161                                                        | -0.672              | 0.057           | -0.995 | -1.751                                  | 3      |
| Glu419  | -0.472                                                        | 0                   | 0.505           | -0.024 | 0.017                                   | 3      |
| Gly344  | -0.043                                                        | 0                   | 0.157           | -0.072 | 0.033                                   | 3      |
| Leu346  | 0.16                                                          | -2.118              | -0.283          | -2.874 | -5.17                                   | 4      |
| Leu525  | -0.062                                                        | -1.952              | -0.165          | -2.471 | -4.658                                  | 4      |
| Met528  | 0.001                                                         | -1.202              | -0.223          | -1.457 | -2.885                                  | 4      |
| Thr347  | -0.096                                                        | -1.196              | -0.005          | -1.512 | -2.843                                  | 4      |
| Leu387  | 0.006                                                         | -1.004              | -0.243          | -1.254 | -2.533                                  | 4      |
| Lys529  | -2.232                                                        | -0.88               | 1.658           | -1.037 | -2.502                                  | 4      |
| Met343  | -0.202                                                        | -1.029              | 0.337           | -1.36  | -2.294                                  | 4      |
| Met421  | -0.105                                                        | -0.906              | 0.068           | -1.313 | -2.22                                   | 4      |
| Met388  | -0.072                                                        | -0.857              | -0.145          | -1.137 | -2.218                                  | 4      |
| Hie524  | -0.356                                                        | -0.901              | 0.352           | -1.349 | -2.206                                  | 4      |
| Ala350  | 0.305                                                         | -1.022              | -0.213          | -1.112 | -2.074                                  | 4      |
| Ile424  | 0.076                                                         | -0.783              | -0.295          | -1.023 | -2.059                                  | 4      |

| Residue | Median Value of MMGBSA Energy Terms (kcal mol <sup>-1</sup> ) |                          |                 |        | MMGBSA En-<br>ergy<br>(kcal mol <sup>-1</sup> ) | Ligand    |
|---------|---------------------------------------------------------------|--------------------------|-----------------|--------|-------------------------------------------------|-----------|
|         | Electrostatic                                                 | Non-Polar Solva-<br>tion | Polar Solvation | vdW    |                                                 |           |
| Phe404  | 0.295                                                         | -0.901                   | -0.286          | -1.146 | -2.049                                          | 4         |
| Leu349  | 0.086                                                         | -0.484                   | -0.445          | -0.928 | -1.672                                          | 4         |
| Leu384  | 0.005                                                         | -0.703                   | -0.087          | -0.869 | -1.651                                          | 4         |
| Leu391  | -0.021                                                        | -0.799                   | -0.056          | -0.748 | -1.651                                          | 4         |
| Asp426  | -0.317                                                        | 0                        | 0.361           | -0.017 | 0.019                                           | 4         |
| Ser518  | -0.052                                                        | 0                        | 0.168           | -0.078 | 0.038                                           | 4         |
| Glu385  | 0.128                                                         | 0                        | -0.053          | -0.051 | 0.04                                            | 4         |
| Glu353  | -7.578                                                        | -0.552                   | 2.539           | 0.677  | -4.896                                          | Estradiol |
| Leu391  | -0.256                                                        | -1.101                   | -0.408          | -1.4   | -3.116                                          | Estradiol |
| Hie524  | -2.543                                                        | -0.814                   | 1.041           | -0.71  | -3.037                                          | Estradiol |
| Leu387  | 0.125                                                         | -1.056                   | -0.571          | -1.511 | -2.981                                          | Estradiol |
| Leu525  | -0.27                                                         | -1.058                   | -0.437          | -1.19  | -2.943                                          | Estradiol |
| Leu346  | -0.174                                                        | -1.057                   | -0.091          | -1.548 | -2.757                                          | Estradiol |
| Met388  | 0.256                                                         | -1.075                   | -0.27           | -1.491 | -2.571                                          | Estradiol |
| Ala350  | -0.085                                                        | -0.87                    | -0.276          | -0.956 | -2.206                                          | Estradiol |
| Phe404  | -0.34                                                         | -0.951                   | 0.441           | -1.344 | -2.174                                          | Estradiol |
| Leu384  | 0.01                                                          | -0.872                   | 0.007           | -1.107 | -1.957                                          | Estradiol |
| Met421  | -0.065                                                        | -0.813                   | 0.167           | -1.146 | -1.867                                          | Estradiol |
| Ile424  | 0.159                                                         | -0.715                   | -0.326          | -0.901 | -1.787                                          | Estradiol |
| Leu349  | 0.015                                                         | -0.496                   | -0.361          | -0.744 | -1.578                                          | Estradiol |
| Glu330  | 0.002                                                         | 0                        | 0.03            | -0.007 | 0.027                                           | Estradiol |
| Gly344  | 0.037                                                         | 0                        | 0.014           | -0.028 | 0.027                                           | Estradiol |
| Glu385  | 0.069                                                         | 0                        | 0.009           | -0.059 | 0.028                                           | Estradiol |
| Asp426  | -0.214                                                        | 0                        | 0.26            | -0.014 | 0.03                                            | Estradiol |
| Glu419  | -0.367                                                        | 0                        | 0.439           | -0.029 | 0.032                                           | Estradiol |
| Ser395  | -0.028                                                        | 0                        | 0.15            | -0.018 | 0.099                                           | Estradiol |
| Asp351  | 0.584                                                         | 0                        | -0.399          | -0.074 | 0.114                                           | Estradiol |
| Tyr526  | 0.057                                                         | 0                        | 0.172           | -0.069 | 0.154                                           | Estradiol |
| Asp351  | -37.689                                                       | -0.791                   | 33.634          | -0.844 | -6.811                                          | 4OHT      |
| Glu353  | -23.177                                                       | -0.649                   | 17.182          | 0.434  | -6.092                                          | 4OHT      |
| Leu525  | -0.412                                                        | -1.896                   | -0.043          | -2.433 | -4.74                                           | 4OHT      |
| Ala350  | 0.186                                                         | -1.613                   | -0.059          | -2.132 | -3.793                                          | 4OHT      |
| Leu387  | 0.365                                                         | -1.05                    | -0.688          | -1.4   | -2.794                                          | 4OHT      |
| Ile424  | 0.173                                                         | -0.95                    | -0.644          | -1.225 | -2.626                                          | 4OHT      |
| Leu346  | -0.451                                                        | -1.096                   | 0.649           | -1.724 | -2.548                                          | 4OHT      |
| Leu391  | 0.624                                                         | -0.936                   | -0.991          | -1.191 | -2.507                                          | 4OHT      |
| Thr347  | -2.612                                                        | -0.903                   | 2.48            | -1.394 | -2.44                                           | 4OHT      |
| Phe404  | -0.502                                                        | -1.092                   | 0.551           | -1.295 | -2.335                                          | 4OHT      |
| Met528  | 0.459                                                         | -0.928                   | -0.62           | -1.192 | -2.289                                          | 4OHT      |
| Leu349  | -0.341                                                        | -0.616                   | -0.367          | -0.915 | -2.238                                          | 4OHT      |
| Met388  | 0.285                                                         | -0.789                   | -0.406          | -0.996 | -1.881                                          | 4OHT      |
| Cys530  | -0.466                                                        | -0.694                   | 0.033           | -0.709 | -1.821                                          | 4OHT      |
| Leu384  | -0.114                                                        | -0.774                   | 0.07            | -0.992 | -1.813                                          | 4OHT      |
| Leu541  | 0.194                                                         | 0                        | -0.173          | -0.002 | 0.017                                           | 4OHT      |
| Asp426  | -7.412                                                        | 0                        | 7.458           | -0.016 | 0.025                                           | 4OHT      |
| Lys416  | 7.007                                                         | 0                        | -6.963          | -0.011 | 0.035                                           | 4OHT      |

| Residue | Median Value of MMGBSA Energy Terms (kcal mol <sup>-1</sup> ) |                     |                 |        | MMGBSA Energy (kcal mol <sup>-1</sup> ) | Ligand |
|---------|---------------------------------------------------------------|---------------------|-----------------|--------|-----------------------------------------|--------|
|         | Electrostatic                                                 | Non-Polar Solvation | Polar Solvation | vdW    |                                         |        |
| Ala405  | 0.03                                                          | 0                   | 0.052           | -0.038 | 0.042                                   | 4OHT   |
| Tyr526  | -0.209                                                        | 0                   | 0.344           | -0.063 | 0.067                                   | 4OHT   |
| Ser395  | 0.229                                                         | 0                   | -0.125          | -0.016 | 0.084                                   | 4OHT   |

**Table S5.** Conventional H-bond occurrence between ligands and ER $\alpha$  over 500-ns MD trajectories.

| Ligand    | ER $\alpha$ | Number of Frames | Fraction | Percentage (%) |
|-----------|-------------|------------------|----------|----------------|
| 2         | Trp383@HE1  | 23               | 0.0005   | 0.05           |
| 2         | Lys529@HZ3  | 10               | 0.0002   | 0.02           |
| 2         | Lys531@HZ3  | 10               | 0.0002   | 0.02           |
| 2         | Lys531@HZ2  | 6                | 0.0001   | 0.01           |
| 2         | Lys529@HZ1  | 5                | 0.0001   | 0.01           |
| 2         | Lys529@HZ2  | 4                | 0.0001   | 0.01           |
| 2         | Lys531@HZ1  | 2                | 0        | 0              |
| 2         | Asn532@HD21 | 1                | 0        | 0              |
| 3         | Asn532@H    | 2773             | 0.0555   | 5.55           |
| 3         | Asn532@HD22 | 1862             | 0.0372   | 3.72           |
| 3         | Val533@H    | 1443             | 0.0289   | 2.89           |
| 3         | Lys531@H    | 244              | 0.0049   | 0.49           |
| 3         | Asn532@HD21 | 241              | 0.0048   | 0.48           |
| 3         | Cys530@H    | 108              | 0.0022   | 0.22           |
| 3         | Val534@H    | 107              | 0.0021   | 0.21           |
| 3         | Lys531@HZ3  | 20               | 0.0004   | 0.04           |
| 3         | Lys531@HZ2  | 13               | 0.0003   | 0.03           |
| 3         | Lys529@HZ2  | 12               | 0.0002   | 0.02           |
| 3         | Lys531@HZ1  | 11               | 0.0002   | 0.02           |
| 3         | Lys529@HZ3  | 10               | 0.0002   | 0.02           |
| 3         | Lys529@HZ1  | 9                | 0.0002   | 0.02           |
| 4         | Gly521@O    | 1082             | 0.0216   | 2.16           |
| 4         | His524@ND1  | 804              | 0.0161   | 1.61           |
| 4         | Lys529@HZ1  | 205              | 0.0041   | 0.41           |
| 4         | Lys529@HZ3  | 174              | 0.0035   | 0.35           |
| 4         | Lys529@HZ2  | 173              | 0.0035   | 0.35           |
| 4         | Thr347@HG1  | 14               | 0.0003   | 0.03           |
| 4         | Gly420@O    | 8                | 0.0002   | 0.02           |
| 4         | Cys530@H    | 7                | 0.0001   | 0.01           |
| 4         | His524@O    | 1                | 0        | 0              |
| 4         | His524@HE2  | 1                | 0        | 0              |
| Estradiol | His524@ND1  | 20156            | 0.4031   | 40.31          |
| Estradiol | Glu353@OE1  | 19556            | 0.3911   | 39.11          |
| Estradiol | Glu353@OE2  | 15848            | 0.317    | 31.7           |
| Estradiol | Arg394@HH22 | 271              | 0.0054   | 0.54           |
| Estradiol | His524@O    | 88               | 0.0018   | 0.18           |
| Estradiol | Gly521@O    | 64               | 0.0013   | 0.13           |
| Estradiol | Leu387@O    | 14               | 0.0003   | 0.03           |
| Estradiol | Thr347@OG1  | 7                | 0.0001   | 0.01           |

| Ligand    | ERα         | Number of Frames | Fraction | Percentage (%) |
|-----------|-------------|------------------|----------|----------------|
| Estradiol | His524@HE2  | 6                | 0.0001   | 0.01           |
| Estradiol | Glu419@O    | 2                | 0        | 0              |
| Estradiol | Arg394@HH12 | 2                | 0        | 0              |
| Estradiol | Phe404@O    | 1                | 0        | 0              |
| Estradiol | Arg394@NH2  | 1                | 0        | 0              |
| 4OHT      | Glu353@OE2  | 30772            | 0.6154   | 61.54          |
| 4OHT      | Asp351@OD1  | 10707            | 0.2141   | 21.41          |
| 4OHT      | Asp351@OD2  | 8589             | 0.1718   | 17.18          |
| 4OHT      | Glu353@OE1  | 615              | 0.0123   | 1.23           |
| 4OHT      | Arg394@HH22 | 43               | 0.0009   | 0.09           |
| 4OHT      | Lys531@O    | 34               | 0.0007   | 0.07           |
| 4OHT      | Thr347@OG1  | 19               | 0.0004   | 0.04           |
| 4OHT      | Thr347@O    | 4                | 0.0001   | 0.01           |
| 4OHT      | Leu387@O    | 2                | 0        | 0              |
| 4OHT      | Ala350@O    | 1                | 0        | 0              |

**Table S6.** Contact surface area (CSA) between **2** and ERα residues every 50 ns over a 500-ns MD trajectory.

| Residue | Contact Surface Area (Å²) |       |        |        |        |        |        |        |        |        |        |
|---------|---------------------------|-------|--------|--------|--------|--------|--------|--------|--------|--------|--------|
|         | 0 ns                      | 50 ns | 100 ns | 150 ns | 200 ns | 250 ns | 300 ns | 350 ns | 400 ns | 450 ns | 500 ns |
| Met342  | 0.00                      | 0.42  | 0.00   | 0.12   | 0.00   | 1.95   | 0.00   | 0.06   | 0.00   | 0.00   | 0.00   |
| Met343  | 27.63                     | 20.93 | 26.50  | 17.28  | 28.96  | 26.33  | 14.90  | 27.93  | 20.07  | 27.70  | 24.74  |
| Gly344  | 0.00                      | 0.14  | 0.15   | 0.87   | 0.00   | 0.54   | 0.00   | 0.17   | 0.00   | 0.00   | 0.00   |
| Leu345  | 0.00                      | 0.00  | 0.00   | 0.00   | 0.00   | 0.00   | 0.00   | 0.00   | 0.00   | 0.02   | 0.11   |
| Leu346  | 0.00                      | 34.86 | 34.91  | 37.61  | 34.27  | 40.16  | 24.71  | 34.73  | 42.15  | 32.72  | 37.70  |
| Thr347  | 26.42                     | 45.34 | 45.48  | 47.88  | 43.89  | 46.49  | 46.38  | 48.20  | 24.95  | 49.74  | 43.05  |
| Asn348  | 0.00                      | 0.51  | 1.51   | 0.97   | 2.34   | 1.88   | 0.00   | 0.71   | 0.00   | 0.22   | 0.27   |
| Leu349  | 0.97                      | 0.00  | 0.11   | 0.49   | 0.00   | 0.24   | 0.23   | 0.00   | 21.68  | 0.00   | 0.00   |
| Ala350  | 38.70                     | 30.12 | 35.39  | 33.23  | 31.42  | 29.83  | 29.65  | 29.95  | 27.61  | 28.66  | 24.12  |
| Asp351  | 27.13                     | 33.91 | 32.92  | 29.78  | 32.46  | 28.48  | 34.80  | 23.67  | 0.00   | 21.34  | 6.28   |
| Arg352  | 0.00                      | 0.00  | 0.00   | 0.15   | 0.00   | 0.00   | 0.21   | 0.00   | 0.00   | 0.00   | 0.00   |
| Glu353  | 15.32                     | 0.00  | 2.25   | 0.00   | 0.00   | 0.00   | 0.00   | 0.00   | 4.07   | 0.00   | 0.00   |
| Leu354  | 21.21                     | 26.12 | 22.60  | 19.87  | 27.34  | 24.98  | 30.11  | 21.26  | 22.55  | 22.11  | 23.32  |
| Trp383  | 30.60                     | 37.21 | 29.20  | 40.00  | 32.11  | 33.03  | 34.08  | 29.26  | 37.85  | 34.85  | 32.87  |
| Leu384  | 24.36                     | 20.86 | 20.55  | 22.71  | 16.58  | 13.71  | 22.24  | 26.06  | 28.97  | 22.68  | 16.75  |
| Leu387  | 42.95                     | 25.99 | 18.39  | 13.56  | 25.51  | 18.55  | 8.29   | 0.69   | 29.16  | 0.45   | 20.77  |
| Met388  | 27.29                     | 26.54 | 21.05  | 12.81  | 15.34  | 21.02  | 15.87  | 13.92  | 25.48  | 20.63  | 17.39  |
| Leu391  | 17.24                     | 17.50 | 17.70  | 5.57   | 13.52  | 16.70  | 3.33   | 0.00   | 18.06  | 0.00   | 9.45   |
| Arg394  | 0.52                      | 0.00  | 0.00   | 0.00   | 0.00   | 0.00   | 0.00   | 0.00   | 0.00   | 0.00   | 0.00   |
| Phe404  | 13.20                     | 18.55 | 15.08  | 14.19  | 17.34  | 7.75   | 0.00   | 3.28   | 19.91  | 0.00   | 10.05  |
| Cys417  | 0.00                      | 0.00  | 0.00   | 0.00   | 0.00   | 0.00   | 0.00   | 0.00   | 0.00   | 0.67   | 0.00   |
| Val418  | 0.00                      | 8.21  | 7.26   | 9.77   | 11.94  | 9.53   | 9.63   | 9.62   | 0.88   | 5.63   | 3.58   |
| Glu419  | 3.19                      | 0.00  | 0.00   | 0.00   | 0.00   | 0.00   | 0.00   | 0.00   | 0.00   | 0.00   | 0.00   |
| Gly420  | 15.69                     | 0.00  | 0.00   | 0.00   | 0.00   | 0.00   | 0.00   | 0.00   | 0.00   | 0.00   | 0.00   |
| Met421  | 43.83                     | 16.45 | 14.90  | 26.78  | 25.29  | 17.08  | 22.36  | 26.67  | 19.54  | 29.17  | 21.35  |
| Ile424  | 17.88                     | 14.40 | 14.06  | 18.28  | 19.74  | 21.94  | 25.12  | 24.63  | 18.78  | 19.43  | 23.80  |
| Phe425  | 0.00                      | 0.00  | 0.00   | 0.00   | 0.00   | 2.72   | 9.02   | 0.00   | 0.00   | 0.00   | 1.05   |
| Met427  | 0.00                      | 0.00  | 0.00   | 0.00   | 0.00   | 0.73   | 0.00   | 0.00   | 0.00   | 0.00   | 0.00   |



| Residue | Contact Surface Area (Å <sup>2</sup> ) |       |        |        |        |        |        |        |        |        |        |
|---------|----------------------------------------|-------|--------|--------|--------|--------|--------|--------|--------|--------|--------|
|         | 0 ns                                   | 50 ns | 100 ns | 150 ns | 200 ns | 250 ns | 300 ns | 350 ns | 400 ns | 450 ns | 500 ns |
| Leu428  | 12.93                                  | 12.54 | 7.57   | 5.74   | 10.78  | 8.02   | 9.22   | 1.79   | 13.71  | 0.00   | 2.69   |
| Met517  | 0.00                                   | 0.00  | 0.00   | 0.00   | 0.00   | 0.00   | 0.00   | 0.00   | 0.80   | 1.32   | 0.00   |
| Ser518  | 0.00                                   | 0.00  | 0.00   | 0.00   | 0.00   | 0.00   | 0.00   | 0.00   | 0.19   | 0.00   | 0.00   |
| Lys520  | 0.00                                   | 0.00  | 0.00   | 0.00   | 0.00   | 0.00   | 0.57   | 0.04   | 0.91   | 0.57   | 0.00   |
| Gly521  | 3.43                                   | 9.67  | 10.66  | 12.44  | 2.68   | 10.92  | 13.35  | 16.53  | 14.62  | 14.90  | 15.04  |
| Met522  | 0.00                                   | 0.00  | 0.00   | 1.45   | 0.00   | 0.00   | 1.65   | 2.65   | 11.22  | 3.64   | 2.39   |
| Leu525  | 34.17                                  | 31.32 | 31.88  | 35.26  | 29.82  | 33.49  | 33.34  | 36.81  | 44.00  | 41.21  | 41.36  |
| Met528  | 23.40                                  | 39.82 | 31.05  | 38.09  | 34.94  | 31.29  | 38.05  | 30.18  | 7.60   | 24.95  | 20.80  |
| Lys529  | 0.00                                   | 45.06 | 38.95  | 35.73  | 40.54  | 47.06  | 0.00   | 0.47   | 0.00   | 0.00   | 0.00   |
| Cys530  | 29.32                                  | 0.65  | 13.55  | 1.14   | 0.38   | 2.02   | 35.63  | 30.29  | 2.41   | 10.85  | 26.24  |
| Lys531  | 0.00                                   | 0.00  | 0.00   | 0.00   | 0.00   | 0.00   | 0.42   | 6.39   | 33.70  | 26.35  | 28.42  |
| Asn532  | 0.00                                   | 0.00  | 0.00   | 0.00   | 28.39  | 0.00   | 27.25  | 37.25  | 32.63  | 31.76  | 29.72  |
| Val533  | 28.18                                  | 17.92 | 16.57  | 31.76  | 0.00   | 22.60  | 0.00   | 0.00   | 0.60   | 0.20   | 0.56   |
| Val534  | 8.84                                   | 2.08  | 5.76   | 14.33  | 3.47   | 2.32   | 0.00   | 0.28   | 4.57   | 7.49   | 6.68   |
| Pro535  | 0.00                                   | 0.00  | 0.13   | 4.25   | 0.00   | 0.00   | 0.00   | 0.00   | 3.17   | 1.52   | 3.44   |
| Leu536  | 15.39                                  | 25.48 | 20.79  | 30.74  | 18.00  | 23.64  | 19.94  | 23.12  | 40.06  | 34.26  | 35.40  |
| Leu539  | 14.60                                  | 21.30 | 23.61  | 11.62  | 25.84  | 20.49  | 18.17  | 24.45  | 17.10  | 20.86  | 21.59  |
| Met543  | 0.00                                   | 1.68  | 0.00   | 0.00   | 0.00   | 0.00   | 0.34   | 0.00   | 0.00   | 0.82   | 0.00   |

**Table S7.** Contact surface area (CSA) between **3** and ER $\alpha$  residues every 50 ns over a 500-ns MD trajectory.

| Residue | Contact Surface Area (Å <sup>2</sup> ) |       |        |        |        |        |        |        |        |        |        |
|---------|----------------------------------------|-------|--------|--------|--------|--------|--------|--------|--------|--------|--------|
|         | 0 ns                                   | 50 ns | 100 ns | 150 ns | 200 ns | 250 ns | 300 ns | 350 ns | 400 ns | 450 ns | 500 ns |
| Met343  | 34.11                                  | 17.83 | 17.91  | 11.34  | 37.35  | 27.67  | 10.25  | 15.52  | 21.15  | 18.88  | 26.35  |
| Leu346  | 21.83                                  | 26.41 | 16.02  | 15.44  | 31.23  | 36.08  | 26.36  | 22.80  | 30.71  | 36.08  | 35.08  |
| Thr347  | 29.82                                  | 43.96 | 43.63  | 41.91  | 45.33  | 42.31  | 39.72  | 43.30  | 47.76  | 42.43  | 45.76  |
| Asn348  | 0.00                                   | 0.07  | 0.04   | 0.00   | 0.30   | 0.00   | 0.00   | 0.00   | 0.22   | 0.00   | 0.16   |
| Ala350  | 32.18                                  | 29.96 | 31.71  | 31.41  | 27.68  | 31.50  | 31.74  | 30.71  | 32.35  | 26.89  | 27.60  |
| Asp351  | 2.37                                   | 23.10 | 19.13  | 29.00  | 20.25  | 16.83  | 16.50  | 15.17  | 19.56  | 16.52  | 13.16  |
| Arg352  | 0.00                                   | 0.24  | 0.00   | 0.00   | 0.00   | 0.00   | 0.14   | 0.00   | 0.00   | 0.00   | 0.00   |
| Glu353  | 0.00                                   | 0.00  | 0.37   | 0.10   | 0.00   | 0.00   | 0.00   | 0.36   | 0.00   | 0.06   | 0.00   |
| Leu354  | 19.18                                  | 22.16 | 38.20  | 36.23  | 19.61  | 25.92  | 28.13  | 20.62  | 29.33  | 33.57  | 26.45  |
| Trp383  | 36.29                                  | 31.72 | 37.28  | 37.36  | 43.21  | 41.88  | 42.11  | 37.98  | 37.27  | 35.40  | 40.75  |
| Leu384  | 25.35                                  | 18.83 | 22.61  | 24.60  | 22.62  | 20.50  | 23.38  | 24.21  | 18.92  | 22.73  | 24.36  |
| Leu387  | 22.93                                  | 35.91 | 15.43  | 15.86  | 30.17  | 30.35  | 32.24  | 33.21  | 43.44  | 33.85  | 33.51  |
| Met388  | 17.06                                  | 31.18 | 14.28  | 11.74  | 24.79  | 25.17  | 29.55  | 25.94  | 30.53  | 25.16  | 8.46   |
| Leu391  | 4.38                                   | 14.51 | 2.54   | 0.00   | 20.50  | 23.68  | 21.99  | 17.41  | 13.81  | 15.57  | 16.70  |
| Arg394  | 0.00                                   | 0.00  | 0.00   | 0.00   | 0.00   | 1.75   | 0.00   | 0.00   | 0.00   | 0.00   | 0.00   |
| Leu402  | 0.00                                   | 0.65  | 0.00   | 0.00   | 0.00   | 0.00   | 0.00   | 0.00   | 0.00   | 0.00   | 0.00   |
| Phe404  | 0.72                                   | 22.04 | 4.51   | 0.00   | 20.44  | 21.15  | 18.28  | 23.19  | 14.54  | 18.93  | 20.98  |
| Val418  | 0.00                                   | 0.00  | 0.00   | 0.00   | 0.00   | 0.00   | 0.00   | 0.00   | 0.00   | 0.00   | 22.43  |
| Glu419  | 1.79                                   | 0.00  | 0.00   | 0.00   | 0.00   | 0.00   | 0.00   | 0.00   | 0.00   | 0.00   | 0.00   |
| Gly420  | 8.09                                   | 0.00  | 0.00   | 0.00   | 0.00   | 0.00   | 0.00   | 0.00   | 0.00   | 0.00   | 0.00   |
| Met421  | 29.97                                  | 27.88 | 27.20  | 32.05  | 17.83  | 24.88  | 20.90  | 26.02  | 29.86  | 23.43  | 29.42  |
| Ile424  | 17.63                                  | 19.55 | 21.67  | 22.71  | 16.21  | 2.27   | 24.35  | 16.82  | 9.29   | 18.40  | 12.36  |
| Phe425  | 0.00                                   | 10.05 | 13.08  | 5.18   | 0.00   | 0.00   | 0.14   | 0.00   | 0.00   | 12.92  | 13.31  |
| Leu428  | 4.00                                   | 19.70 | 11.89  | 4.57   | 11.02  | 8.33   | 14.77  | 14.01  | 14.29  | 15.02  | 7.97   |

| Residue | Contact Surface Area (Å <sup>2</sup> ) |       |        |        |        |        |        |        |        |        |        |
|---------|----------------------------------------|-------|--------|--------|--------|--------|--------|--------|--------|--------|--------|
|         | 0 ns                                   | 50 ns | 100 ns | 150 ns | 200 ns | 250 ns | 300 ns | 350 ns | 400 ns | 450 ns | 500 ns |
| Met517  | 0.68                                   | 0.00  | 0.00   | 0.00   | 0.00   | 0.00   | 0.00   | 0.00   | 0.00   | 0.00   | 0.00   |
| Ser518  | 0.20                                   | 0.00  | 0.00   | 0.00   | 0.00   | 0.00   | 0.00   | 0.00   | 0.00   | 0.00   | 0.00   |
| Lys520  | 0.44                                   | 0.00  | 0.00   | 0.00   | 0.00   | 0.00   | 0.00   | 0.00   | 0.00   | 0.00   | 0.00   |
| Gly521  | 17.17                                  | 0.00  | 15.71  | 10.71  | 2.43   | 6.68   | 5.07   | 1.33   | 0.86   | 5.20   | 0.85   |
| Met522  | 4.36                                   | 0.00  | 3.99   | 5.30   | 0.00   | 0.00   | 0.06   | 0.00   | 0.00   | 0.00   | 0.00   |
| Leu525  | 38.07                                  | 37.02 | 43.94  | 36.29  | 46.02  | 42.40  | 37.56  | 37.21  | 36.75  | 37.09  | 32.30  |
| Met528  | 41.20                                  | 12.77 | 12.19  | 6.30   | 0.00   | 0.00   | 16.19  | 28.91  | 13.42  | 11.65  | 9.63   |
| Lys529  | 26.29                                  | 2.14  | 0.00   | 0.00   | 0.00   | 0.00   | 0.00   | 0.00   | 0.00   | 0.00   | 0.00   |
| Cys530  | 2.47                                   | 33.41 | 0.00   | 45.01  | 31.96  | 0.00   | 40.58  | 26.95  | 30.98  | 26.37  | 18.43  |
| Lys531  | 0.00                                   | 22.82 | 0.00   | 40.57  | 19.65  | 11.45  | 17.45  | 13.52  | 8.18   | 39.82  | 40.77  |
| Asn532  | 0.00                                   | 23.10 | 38.29  | 25.51  | 29.31  | 29.34  | 29.53  | 29.66  | 29.83  | 24.19  | 20.17  |
| Val533  | 25.66                                  | 0.00  | 0.00   | 0.00   | 0.00   | 27.04  | 0.00   | 18.66  | 5.70   | 0.00   | 0.00   |
| Val534  | 7.66                                   | 0.00  | 0.00   | 0.47   | 0.00   | 21.37  | 6.20   | 24.14  | 4.17   | 0.00   | 0.10   |
| Pro535  | 0.24                                   | 0.00  | 0.00   | 0.00   | 0.00   | 3.51   | 4.94   | 4.05   | 0.00   | 0.00   | 0.00   |
| Leu536  | 29.58                                  | 32.86 | 25.15  | 31.53  | 28.08  | 34.56  | 34.46  | 36.55  | 24.09  | 27.98  | 30.60  |
| Leu539  | 25.06                                  | 17.54 | 30.56  | 19.81  | 4.73   | 19.64  | 12.17  | 19.37  | 23.65  | 24.68  | 11.61  |
| Met543  | 0.00                                   | 0.00  | 9.31   | 3.94   | 0.00   | 0.00   | 0.00   | 0.00   | 0.00   | 0.00   | 0.00   |

**Table S8.** Contact surface area (CSA) between **4** and ER $\alpha$  residues every 50 ns over a 500-ns MD trajectory.

| Residue | Contact Surface Area (Å <sup>2</sup> ) |       |        |        |        |        |        |        |        |        |        |
|---------|----------------------------------------|-------|--------|--------|--------|--------|--------|--------|--------|--------|--------|
|         | 0 ns                                   | 50 ns | 100 ns | 150 ns | 200 ns | 250 ns | 300 ns | 350 ns | 400 ns | 450 ns | 500 ns |
| Met342  | 0.00                                   | 0.00  | 0.00   | 0.46   | 0.00   | 0.00   | 0.00   | 0.00   | 0.00   | 0.01   | 0.00   |
| Met343  | 27.54                                  | 36.13 | 26.85  | 32.10  | 31.66  | 34.19  | 39.61  | 29.37  | 36.53  | 38.21  | 23.85  |
| Gly344  | 0.00                                   | 0.00  | 0.00   | 0.00   | 0.00   | 0.00   | 0.00   | 0.00   | 0.62   | 0.23   | 0.00   |
| Leu346  | 32.19                                  | 48.75 | 48.76  | 45.63  | 46.84  | 48.56  | 49.19  | 46.15  | 45.61  | 48.31  | 46.36  |
| Thr347  | 48.39                                  | 39.57 | 35.44  | 37.92  | 35.67  | 38.55  | 40.86  | 36.82  | 28.83  | 39.92  | 37.62  |
| Asn348  | 0.47                                   | 0.00  | 0.00   | 0.00   | 0.00   | 0.45   | 0.00   | 0.09   | 0.00   | 0.00   | 0.00   |
| Leu349  | 2.55                                   | 17.41 | 20.69  | 20.95  | 19.11  | 13.62  | 7.12   | 23.70  | 28.10  | 12.53  | 0.00   |
| Ala350  | 28.46                                  | 24.16 | 32.53  | 32.37  | 34.55  | 34.45  | 16.19  | 35.07  | 26.62  | 27.54  | 27.76  |
| Asp351  | 28.76                                  | 0.00  | 0.00   | 0.00   | 1.43   | 0.00   | 0.00   | 0.13   | 0.38   | 0.00   | 0.00   |
| Glu353  | 0.00                                   | 0.12  | 16.64  | 24.47  | 25.54  | 13.51  | 0.00   | 13.00  | 28.66  | 4.15   | 15.59  |
| Leu354  | 15.14                                  | 0.00  | 0.00   | 5.45   | 3.30   | 0.00   | 0.00   | 0.00   | 0.26   | 0.00   | 12.35  |
| Trp383  | 36.94                                  | 29.90 | 3.54   | 20.15  | 16.80  | 8.04   | 5.75   | 19.54  | 3.38   | 11.55  | 33.12  |
| Leu384  | 23.27                                  | 20.61 | 18.78  | 20.30  | 14.74  | 33.19  | 18.15  | 17.91  | 24.48  | 26.28  | 19.76  |
| Glu385  | 0.00                                   | 0.00  | 0.00   | 0.00   | 0.00   | 1.06   | 0.00   | 0.00   | 0.00   | 0.00   | 0.00   |
| Leu387  | 27.14                                  | 29.43 | 28.12  | 37.21  | 40.66  | 35.55  | 19.59  | 31.21  | 42.98  | 28.81  | 35.95  |
| Met388  | 19.70                                  | 28.69 | 28.91  | 31.72  | 34.53  | 34.49  | 18.21  | 28.82  | 31.58  | 30.63  | 33.03  |
| Leu391  | 7.05                                   | 15.96 | 19.61  | 26.86  | 24.68  | 16.90  | 7.91   | 19.55  | 24.87  | 22.71  | 26.99  |
| Arg394  | 0.00                                   | 0.00  | 0.38   | 5.68   | 7.35   | 0.24   | 0.00   | 1.08   | 8.97   | 0.00   | 4.17   |
| Leu402  | 0.00                                   | 0.00  | 0.00   | 1.19   | 0.00   | 0.00   | 0.00   | 0.00   | 0.00   | 0.00   | 0.00   |
| Phe404  | 16.55                                  | 18.11 | 31.12  | 28.66  | 27.34  | 8.74   | 10.36  | 45.31  | 40.29  | 23.44  | 41.22  |
| Ala405  | 0.00                                   | 0.00  | 0.00   | 0.00   | 0.00   | 0.00   | 0.00   | 0.00   | 0.38   | 0.00   | 0.00   |
| Val418  | 0.00                                   | 11.89 | 5.97   | 3.28   | 5.73   | 17.24  | 29.07  | 13.82  | 13.53  | 2.85   | 6.83   |
| Glu419  | 0.00                                   | 4.05  | 0.00   | 0.00   | 0.00   | 0.00   | 19.86  | 0.00   | 0.00   | 15.98  | 0.00   |
| Gly420  | 0.00                                   | 3.25  | 0.00   | 0.00   | 0.00   | 0.31   | 8.79   | 0.00   | 0.00   | 0.63   | 0.00   |
| Met421  | 26.91                                  | 33.92 | 24.03  | 25.34  | 18.05  | 26.87  | 38.82  | 23.39  | 25.43  | 41.78  | 25.38  |

| Residue | Contact Surface Area (A2) |       |        |        |        |        |        |        |        |        |        |
|---------|---------------------------|-------|--------|--------|--------|--------|--------|--------|--------|--------|--------|
|         | 0 ns                      | 50 ns | 100 ns | 150 ns | 200 ns | 250 ns | 300 ns | 350 ns | 400 ns | 450 ns | 500 ns |
| Ile424  | 16.43                     | 30.49 | 20.45  | 13.87  | 16.33  | 26.87  | 27.69  | 19.46  | 22.33  | 22.30  | 18.14  |
| Phe425  | 0.00                      | 0.18  | 0.00   | 0.00   | 0.00   | 0.00   | 0.00   | 0.00   | 0.54   | 0.00   | 0.00   |
| Leu428  | 4.13                      | 14.75 | 8.69   | 19.31  | 7.52   | 6.75   | 2.86   | 11.46  | 23.18  | 22.47  | 21.55  |
| Met517  | 0.00                      | 0.01  | 0.00   | 0.00   | 0.00   | 0.00   | 0.00   | 0.00   | 0.00   | 0.00   | 0.00   |
| Lys520  | 0.31                      | 1.38  | 0.36   | 0.00   | 0.00   | 0.68   | 1.12   | 0.00   | 0.00   | 1.18   | 0.00   |
| Gly521  | 16.67                     | 16.32 | 14.88  | 2.01   | 3.51   | 17.06  | 19.72  | 7.49   | 11.41  | 16.50  | 7.63   |
| Met522  | 7.54                      | 2.47  | 1.70   | 0.00   | 0.00   | 1.97   | 2.73   | 0.00   | 1.77   | 6.14   | 0.00   |
| Leu525  | 45.03                     | 35.69 | 46.09  | 43.46  | 40.57  | 36.95  | 39.62  | 40.74  | 32.88  | 48.84  | 38.20  |
| Tyr526  | 0.00                      | 0.00  | 0.00   | 0.54   | 0.02   | 0.00   | 0.00   | 0.00   | 0.01   | 0.00   | 0.00   |
| Met528  | 28.43                     | 35.74 | 44.75  | 22.03  | 20.47  | 40.88  | 43.97  | 32.36  | 32.41  | 28.34  | 18.76  |
| Lys529  | 2.81                      | 0.00  | 22.36  | 31.75  | 27.05  | 32.05  | 0.00   | 32.86  | 12.24  | 45.55  | 27.65  |
| Cys530  | 0.00                      | 0.00  | 0.00   | 1.62   | 6.76   | 0.00   | 0.00   | 2.84   | 0.00   | 1.71   | 0.00   |
| Val533  | 0.00                      | 0.00  | 4.14   | 33.37  | 30.68  | 0.00   | 0.00   | 28.73  | 0.00   | 0.00   | 14.43  |
| Leu536  | 27.82                     | 0.00  | 0.00   | 0.00   | 0.00   | 0.00   | 0.00   | 0.00   | 0.00   | 0.00   | 17.70  |
| Leu539  | 14.63                     | 0.00  | 1.23   | 0.00   | 0.00   | 0.00   | 0.00   | 0.00   | 0.00   | 0.00   | 0.00   |

**Table S9.** Contact surface area (CSA) between estradiol and ER $\alpha$  residues every 50 ns over a 500-ns MD trajectory.

| Residue | Contact Surface Area (A2) |       |        |        |        |        |        |        |        |        |        |
|---------|---------------------------|-------|--------|--------|--------|--------|--------|--------|--------|--------|--------|
|         | 0 ns                      | 50 ns | 100 ns | 150 ns | 200 ns | 250 ns | 300 ns | 350 ns | 400 ns | 450 ns | 500 ns |
| Met343  | 20.96                     | 0.00  | 0.00   | 25.31  | 0.00   | 0.00   | 13.10  | 0.00   | 0.00   | 0.00   | 0.49   |
| Leu345  | 0.00                      | 0.00  | 0.00   | 0.00   | 0.00   | 0.00   | 0.00   | 0.42   | 0.00   | 0.00   | 0.00   |
| Leu346  | 30.08                     | 31.82 | 32.18  | 34.67  | 29.82  | 31.04  | 24.90  | 37.59  | 34.25  | 32.41  | 29.45  |
| Thr347  | 11.01                     | 10.04 | 8.33   | 9.84   | 8.02   | 1.32   | 14.93  | 19.74  | 12.91  | 21.39  | 23.86  |
| Asn348  | 0.00                      | 0.00  | 0.00   | 0.00   | 0.00   | 0.00   | 0.00   | 0.00   | 0.00   | 0.00   | 0.31   |
| Leu349  | 16.98                     | 15.49 | 10.14  | 18.32  | 21.61  | 20.09  | 16.56  | 30.41  | 26.74  | 16.04  | 28.16  |
| Ala350  | 21.60                     | 24.68 | 28.68  | 23.89  | 23.94  | 25.67  | 21.94  | 31.92  | 28.69  | 27.78  | 28.47  |
| Asp351  | 0.00                      | 0.00  | 0.00   | 0.00   | 0.00   | 0.00   | 0.00   | 0.00   | 0.00   | 0.00   | 0.06   |
| Glu353  | 18.11                     | 17.95 | 28.31  | 18.38  | 22.61  | 26.53  | 23.77  | 24.64  | 20.98  | 20.27  | 24.38  |
| Trp383  | 11.83                     | 9.83  | 1.26   | 7.16   | 1.00   | 3.33   | 1.99   | 2.69   | 0.00   | 9.53   | 0.00   |
| Leu384  | 21.66                     | 19.15 | 27.87  | 30.60  | 19.90  | 22.71  | 16.75  | 23.79  | 26.52  | 26.61  | 23.48  |
| Leu387  | 42.72                     | 38.72 | 30.83  | 32.36  | 37.47  | 35.68  | 41.80  | 26.00  | 29.38  | 34.00  | 20.74  |
| Met388  | 30.46                     | 27.56 | 34.24  | 30.09  | 29.27  | 33.82  | 31.63  | 22.06  | 28.69  | 31.49  | 25.21  |
| Gly390  | 2.20                      | 1.19  | 1.83   | 0.72   | 0.60   | 0.60   | 1.55   | 0.00   | 0.00   | 0.00   | 0.00   |
| Leu391  | 28.38                     | 25.71 | 31.36  | 28.41  | 28.81  | 27.85  | 29.60  | 25.56  | 26.02  | 30.31  | 25.00  |
| Arg394  | 15.53                     | 14.56 | 12.73  | 13.32  | 10.15  | 13.55  | 16.85  | 10.16  | 11.04  | 17.67  | 8.23   |
| Leu402  | 0.00                      | 0.00  | 0.00   | 0.00   | 0.10   | 0.00   | 0.00   | 0.00   | 0.00   | 0.00   | 0.00   |
| Phe404  | 21.17                     | 30.06 | 26.27  | 19.86  | 23.71  | 27.12  | 29.17  | 34.36  | 29.68  | 31.09  | 35.62  |
| Leu408  | 0.00                      | 0.00  | 0.00   | 0.00   | 0.00   | 0.00   | 0.00   | 0.63   | 0.00   | 0.00   | 0.00   |
| Val418  | 0.00                      | 0.71  | 2.05   | 1.05   | 0.05   | 0.00   | 0.00   | 0.00   | 0.00   | 0.94   | 0.00   |
| Glu419  | 0.24                      | 0.00  | 0.00   | 0.00   | 0.00   | 0.00   | 0.00   | 0.00   | 0.00   | 0.00   | 0.00   |
| Gly420  | 0.74                      | 0.00  | 0.00   | 0.00   | 0.00   | 0.00   | 0.00   | 0.00   | 0.00   | 0.00   | 0.00   |
| Met421  | 28.11                     | 25.60 | 18.69  | 22.87  | 22.66  | 17.62  | 21.80  | 13.21  | 14.19  | 20.09  | 22.46  |
| Ile424  | 13.04                     | 19.39 | 17.65  | 13.13  | 22.72  | 18.15  | 21.85  | 7.69   | 23.32  | 12.44  | 18.15  |
| Phe425  | 0.00                      | 0.00  | 0.00   | 0.00   | 0.00   | 0.00   | 0.00   | 0.00   | 7.55   | 0.00   | 3.49   |
| Met427  | 0.00                      | 0.00  | 0.00   | 0.00   | 0.00   | 0.00   | 0.00   | 0.00   | 1.62   | 0.00   | 0.00   |
| Leu428  | 11.21                     | 15.16 | 20.04  | 14.67  | 20.54  | 19.80  | 19.87  | 7.85   | 9.69   | 12.29  | 5.26   |

| Residue | Contact Surface Area (A2) |       |        |        |        |        |        |        |        |        |        |
|---------|---------------------------|-------|--------|--------|--------|--------|--------|--------|--------|--------|--------|
|         | 0 ns                      | 50 ns | 100 ns | 150 ns | 200 ns | 250 ns | 300 ns | 350 ns | 400 ns | 450 ns | 500 ns |
| Met517  | 0.00                      | 0.00  | 0.00   | 0.00   | 0.00   | 0.49   | 0.00   | 0.00   | 0.00   | 0.00   | 0.00   |
| Lys520  | 0.00                      | 0.54  | 0.69   | 0.00   | 0.51   | 0.72   | 0.28   | 0.00   | 0.31   | 0.08   | 0.10   |
| Gly521  | 13.81                     | 13.56 | 14.71  | 11.39  | 15.10  | 14.46  | 12.80  | 12.16  | 13.75  | 13.09  | 13.31  |
| Met522  | 0.71                      | 2.03  | 3.71   | 0.00   | 1.47   | 1.31   | 0.98   | 2.47   | 3.68   | 2.12   | 3.02   |
| Leu525  | 27.90                     | 27.62 | 32.41  | 32.22  | 26.67  | 24.68  | 29.81  | 29.53  | 26.78  | 24.37  | 30.52  |
| Tyr526  | 0.00                      | 0.00  | 0.00   | 0.00   | 0.00   | 0.00   | 0.02   | 0.00   | 0.00   | 0.00   | 0.00   |
| Met528  | 4.56                      | 7.53  | 8.93   | 3.09   | 20.96  | 16.81  | 0.00   | 16.02  | 15.60  | 8.33   | 12.05  |

**Table S10.** Contact surface area (CSA) between 4OHT and ER $\alpha$  residues every 50 ns over a 500-ns MD trajectory.

| Residue | Contact Surface Area (A2) |       |        |        |        |        |        |        |        |        |        |
|---------|---------------------------|-------|--------|--------|--------|--------|--------|--------|--------|--------|--------|
|         | 0 ns                      | 50 ns | 100 ns | 150 ns | 200 ns | 250 ns | 300 ns | 350 ns | 400 ns | 450 ns | 500 ns |
| Leu327  | 0.00                      | 1.88  | 1.58   | 0.00   | 2.11   | 3.75   | 0.31   | 2.01   | 3.29   | 0.00   | 0.00   |
| Met343  | 29.42                     | 19.57 | 0.00   | 14.87  | 0.00   | 0.00   | 0.00   | 0.00   | 0.00   | 0.00   | 26.07  |
| Leu345  | 1.26                      | 0.00  | 0.00   | 0.00   | 0.00   | 0.00   | 0.00   | 0.00   | 0.00   | 0.00   | 0.00   |
| Leu346  | 40.90                     | 33.56 | 31.20  | 33.60  | 39.88  | 29.39  | 32.16  | 35.63  | 35.67  | 35.90  | 36.91  |
| Thr347  | 39.12                     | 3.16  | 12.33  | 35.14  | 29.25  | 22.46  | 29.84  | 29.01  | 22.37  | 36.34  | 43.66  |
| Asn348  | 0.00                      | 0.00  | 0.00   | 0.00   | 0.00   | 0.00   | 0.68   | 0.34   | 1.19   | 2.84   | 0.09   |
| Leu349  | 25.37                     | 26.38 | 23.76  | 25.63  | 27.36  | 22.46  | 24.06  | 24.61  | 20.65  | 24.92  | 25.37  |
| Ala350  | 25.78                     | 34.56 | 33.40  | 26.25  | 28.93  | 31.92  | 32.08  | 32.53  | 27.26  | 29.93  | 26.70  |
| Asp351  | 29.39                     | 19.92 | 18.99  | 31.36  | 6.35   | 19.41  | 28.69  | 26.37  | 12.89  | 34.56  | 0.00   |
| Glu353  | 20.25                     | 26.73 | 25.11  | 21.15  | 22.57  | 20.77  | 22.64  | 23.25  | 22.41  | 22.48  | 25.63  |
| Leu354  | 5.61                      | 22.71 | 21.41  | 8.48   | 0.00   | 17.55  | 17.76  | 20.79  | 0.00   | 0.00   | 0.00   |
| Trp383  | 29.75                     | 30.42 | 32.54  | 23.59  | 28.09  | 37.64  | 30.10  | 23.70  | 34.97  | 23.19  | 22.59  |
| Leu384  | 24.72                     | 20.21 | 21.13  | 27.61  | 20.61  | 20.05  | 21.34  | 22.56  | 21.48  | 19.93  | 26.83  |
| Leu387  | 30.02                     | 22.87 | 28.91  | 28.48  | 30.91  | 33.10  | 29.97  | 29.56  | 33.51  | 35.75  | 28.62  |
| Met388  | 28.51                     | 16.45 | 30.58  | 31.09  | 27.58  | 25.27  | 27.33  | 21.51  | 23.72  | 21.95  | 31.34  |
| Leu391  | 25.41                     | 29.08 | 23.73  | 23.39  | 23.84  | 25.15  | 22.77  | 25.73  | 25.38  | 22.94  | 25.66  |
| Arg394  | 10.35                     | 10.48 | 7.24   | 8.00   | 8.39   | 9.26   | 6.89   | 7.43   | 9.01   | 4.35   | 9.36   |
| Leu402  | 0.00                      | 0.00  | 1.71   | 0.00   | 3.46   | 1.27   | 0.44   | 0.00   | 3.39   | 3.15   | 0.00   |
| Phe404  | 33.74                     | 36.32 | 40.77  | 33.55  | 37.43  | 40.64  | 34.79  | 32.39  | 37.95  | 34.10  | 33.83  |
| Val418  | 1.13                      | 0.27  | 0.00   | 0.00   | 0.00   | 0.00   | 0.00   | 0.00   | 0.00   | 0.26   | 0.00   |
| Glu419  | 4.75                      | 0.00  | 0.00   | 0.00   | 0.00   | 0.00   | 0.00   | 0.00   | 0.00   | 0.00   | 0.00   |
| Gly420  | 6.62                      | 0.00  | 0.00   | 0.00   | 0.00   | 0.00   | 0.00   | 0.00   | 0.00   | 0.00   | 0.00   |
| Met421  | 32.76                     | 25.34 | 25.71  | 19.22  | 26.44  | 22.89  | 25.11  | 21.93  | 22.71  | 22.90  | 17.26  |
| Ile424  | 17.53                     | 28.21 | 26.48  | 19.07  | 25.87  | 25.45  | 28.98  | 28.45  | 29.14  | 26.07  | 27.92  |
| Phe425  | 0.00                      | 18.07 | 8.28   | 1.09   | 9.28   | 4.40   | 16.40  | 20.11  | 20.01  | 18.35  | 11.65  |
| Leu428  | 15.48                     | 17.31 | 17.22  | 21.98  | 15.93  | 21.73  | 13.81  | 15.81  | 13.33  | 16.19  | 21.46  |
| Met517  | 0.00                      | 0.00  | 1.44   | 0.07   | 1.29   | 2.91   | 0.74   | 0.66   | 0.03   | 0.00   | 2.03   |
| Ser518  | 0.00                      | 0.00  | 0.00   | 0.00   | 0.49   | 0.00   | 0.00   | 0.00   | 0.00   | 0.00   | 0.00   |
| Lys520  | 0.54                      | 0.00  | 1.64   | 0.29   | 1.04   | 0.45   | 1.17   | 0.63   | 0.52   | 0.00   | 0.00   |
| Gly521  | 13.68                     | 8.82  | 12.89  | 12.91  | 13.04  | 12.66  | 12.96  | 12.91  | 11.88  | 11.65  | 11.87  |
| Met522  | 2.37                      | 1.77  | 2.05   | 4.11   | 4.22   | 2.26   | 2.55   | 1.75   | 6.03   | 0.47   | 1.86   |
| Leu525  | 36.83                     | 38.11 | 37.95  | 37.98  | 43.96  | 38.87  | 38.67  | 39.69  | 42.76  | 36.54  | 54.69  |
| Ser527  | 0.00                      | 0.00  | 1.17   | 0.00   | 0.00   | 0.00   | 2.45   | 0.00   | 3.36   | 0.00   | 0.00   |
| Met528  | 9.30                      | 15.57 | 35.60  | 16.58  | 28.80  | 30.83  | 29.21  | 29.66  | 35.92  | 33.43  | 1.97   |
| Cys530  | 0.00                      | 20.44 | 32.78  | 30.52  | 25.25  | 37.22  | 28.53  | 32.26  | 24.20  | 29.38  | 30.75  |

| Residue | Contact Surface Area (A2) |       |        |        |        |        |        |        |        |        |        |
|---------|---------------------------|-------|--------|--------|--------|--------|--------|--------|--------|--------|--------|
|         | 0 ns                      | 50 ns | 100 ns | 150 ns | 200 ns | 250 ns | 300 ns | 350 ns | 400 ns | 450 ns | 500 ns |
| Lys531  | 0.00                      | 0.00  | 1.37   | 1.99   | 13.41  | 12.56  | 6.35   | 2.88   | 13.73  | 5.13   | 14.55  |
| Asn532  | 0.00                      | 26.33 | 0.71   | 0.00   | 23.86  | 0.43   | 0.00   | 0.00   | 12.00  | 0.00   | 22.49  |
| Val533  | 0.00                      | 0.00  | 0.00   | 0.00   | 7.91   | 0.00   | 0.00   | 0.00   | 0.00   | 0.00   | 4.98   |
| Val534  | 0.00                      | 2.69  | 3.67   | 10.08  | 19.41  | 0.46   | 1.38   | 0.00   | 28.40  | 0.00   | 24.67  |
| Leu536  | 0.00                      | 25.35 | 26.96  | 0.00   | 0.00   | 24.01  | 2.86   | 3.70   | 3.29   | 0.91   | 0.00   |
| Leu539  | 0.00                      | 5.56  | 17.40  | 0.00   | 0.00   | 3.03   | 2.81   | 0.00   | 0.00   | 0.00   | 0.00   |
